# Supplementary material
Source: Springer Nature journal article supplement (https://www.springermedizin.de/resource/supplementary/12911_2010_384_MOESM2_ESM.pdf/9525762)

|                      |
|----------------------|
| 5170231111           |
|                      |
| Wilson, Dav 01011939 |

|                      |
|----------------------|
|                      |
| 4496644              |
| Wilson, Dav 14061940 |

|                      |
|----------------------|
|                      |
|                      |
| Wilson, Dav 23011969 |

|                      |
|----------------------|
| 3119004037           |
| 4118890              |
| Wilson, Dav 23011969 |

|                      |
|----------------------|
|                      |
| 4118890              |
| Wilson, Dav 23011969 |

|                      |
|----------------------|
| 3119004037           |
|                      |
| Wilson, Dav 23011969 |

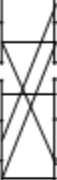

Supplement: MOESM2 [file 9525762]
